# Supplementary material
Source: PubMed Central journal article supplement (PMC4512923)
Supplement: NIHMS701069-supplement-Supplement.pdf [file NIHMS701069-supplement-Supplement.pdf]

## Suppl. Fig. 1

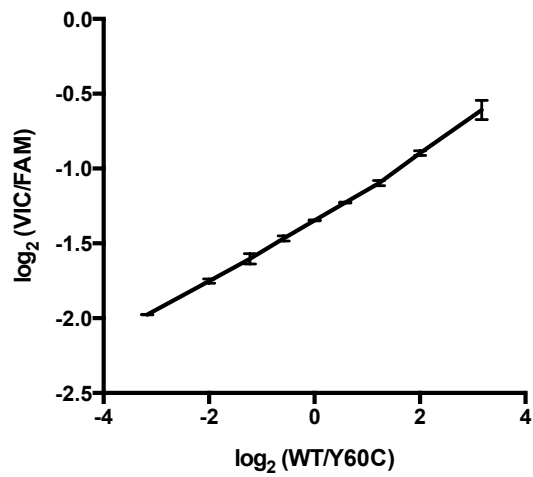

**Suppl. Fig. 1.** DNA from WT and Y60C CTLA-4 constructs (see Methods) were mixed so that the mix contained between 10 and 90% of WT and Y60C DNA. The figure demonstrates that the  $\log_2$  value of this ratio has a linear relationship with the ratio of the  $\log_2$  of the ratio of the VIC to FAM signal observed with a Taqman genotyping assay. The ratio between the VIC and FAM signal was then used to determine the allele specific expression in samples from the family.

## Suppl. Fig. 2

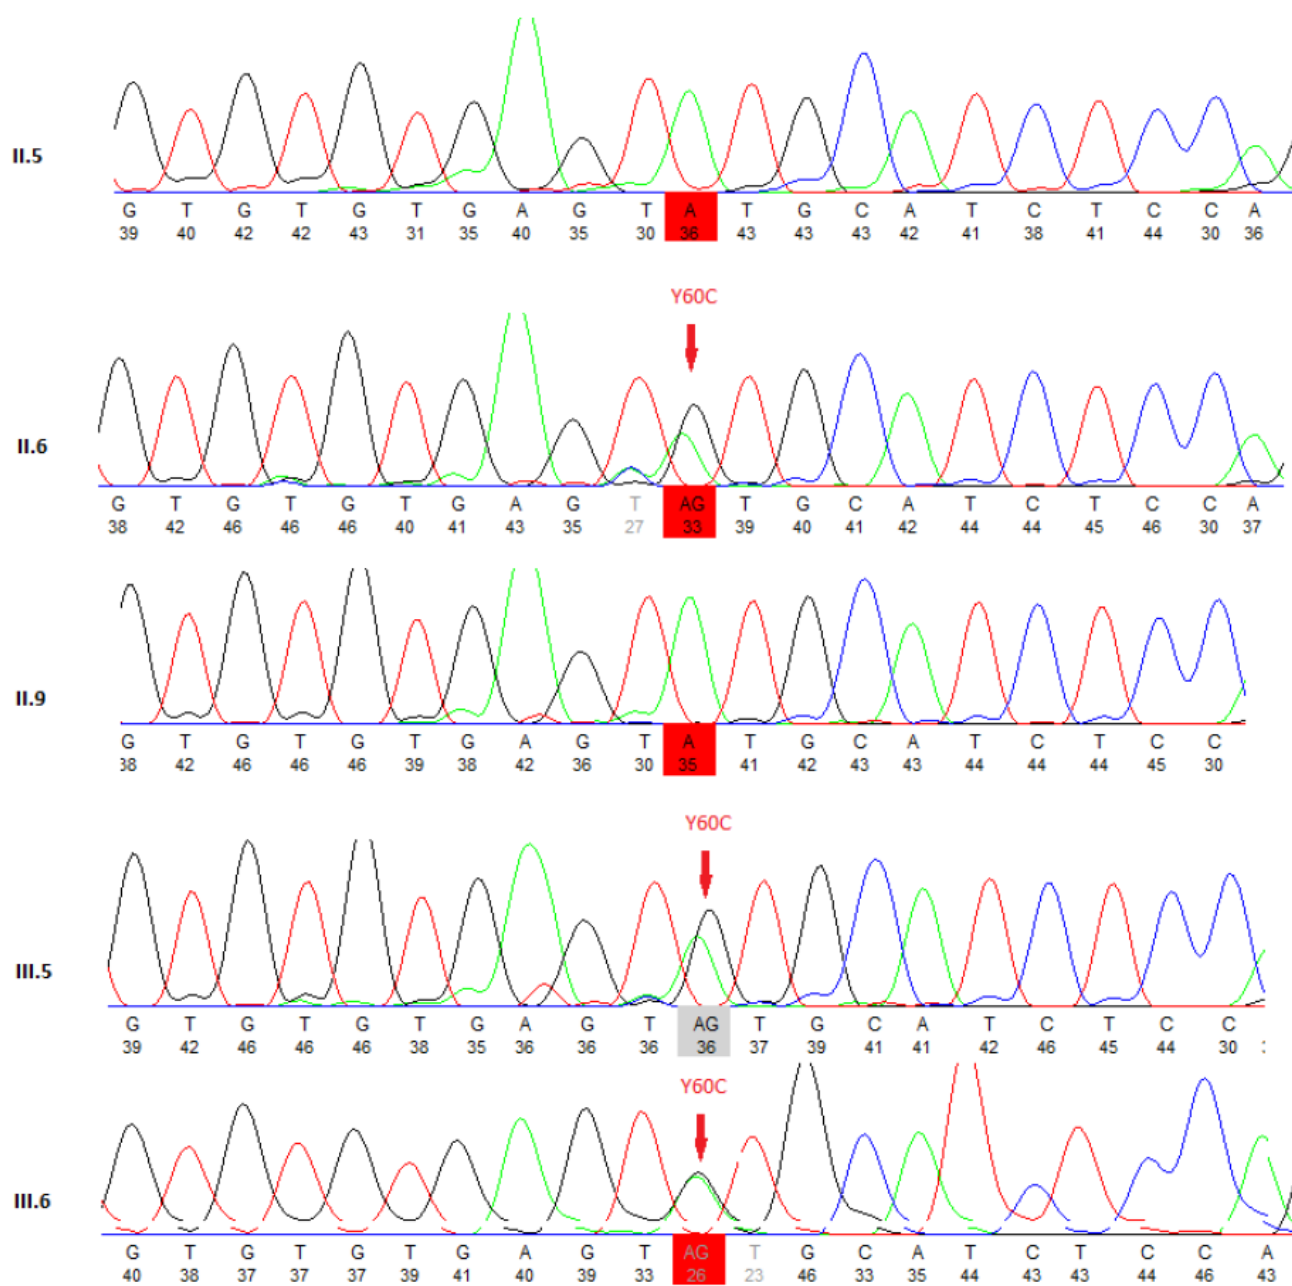

**Suppl. Fig. 2.** Sanger sequencing traces of the affected family showing the presence or absence of *CTLA4* c.179A>G.

### Suppl. Fig. 3

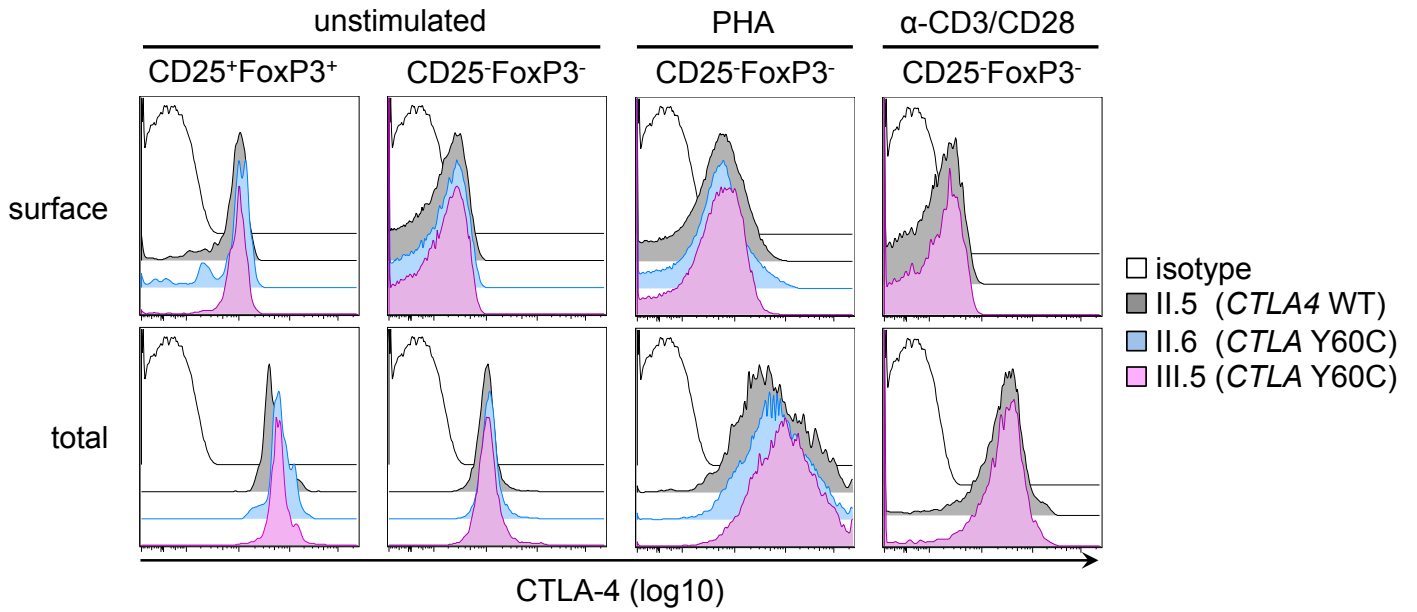

**Suppl. Fig. 3. Unaltered expression of CTLA-4 Y60C by primary T cells.** Cell surface and total (surface and intracellular) expression of CTLA-4 by CD3<sup>+</sup> CD4<sup>+</sup> CD25<sup>+</sup> FoxP3<sup>+</sup> Tregs and CD3<sup>+</sup> CD4<sup>+</sup> CD25<sup>-</sup> FoxP3<sup>-</sup> T cells as determined by flow cytometry either directly *ex vivo* (unstimulated) or after activation by anti-CD3/CD28 or PHA.

## Suppl. Fig. 4

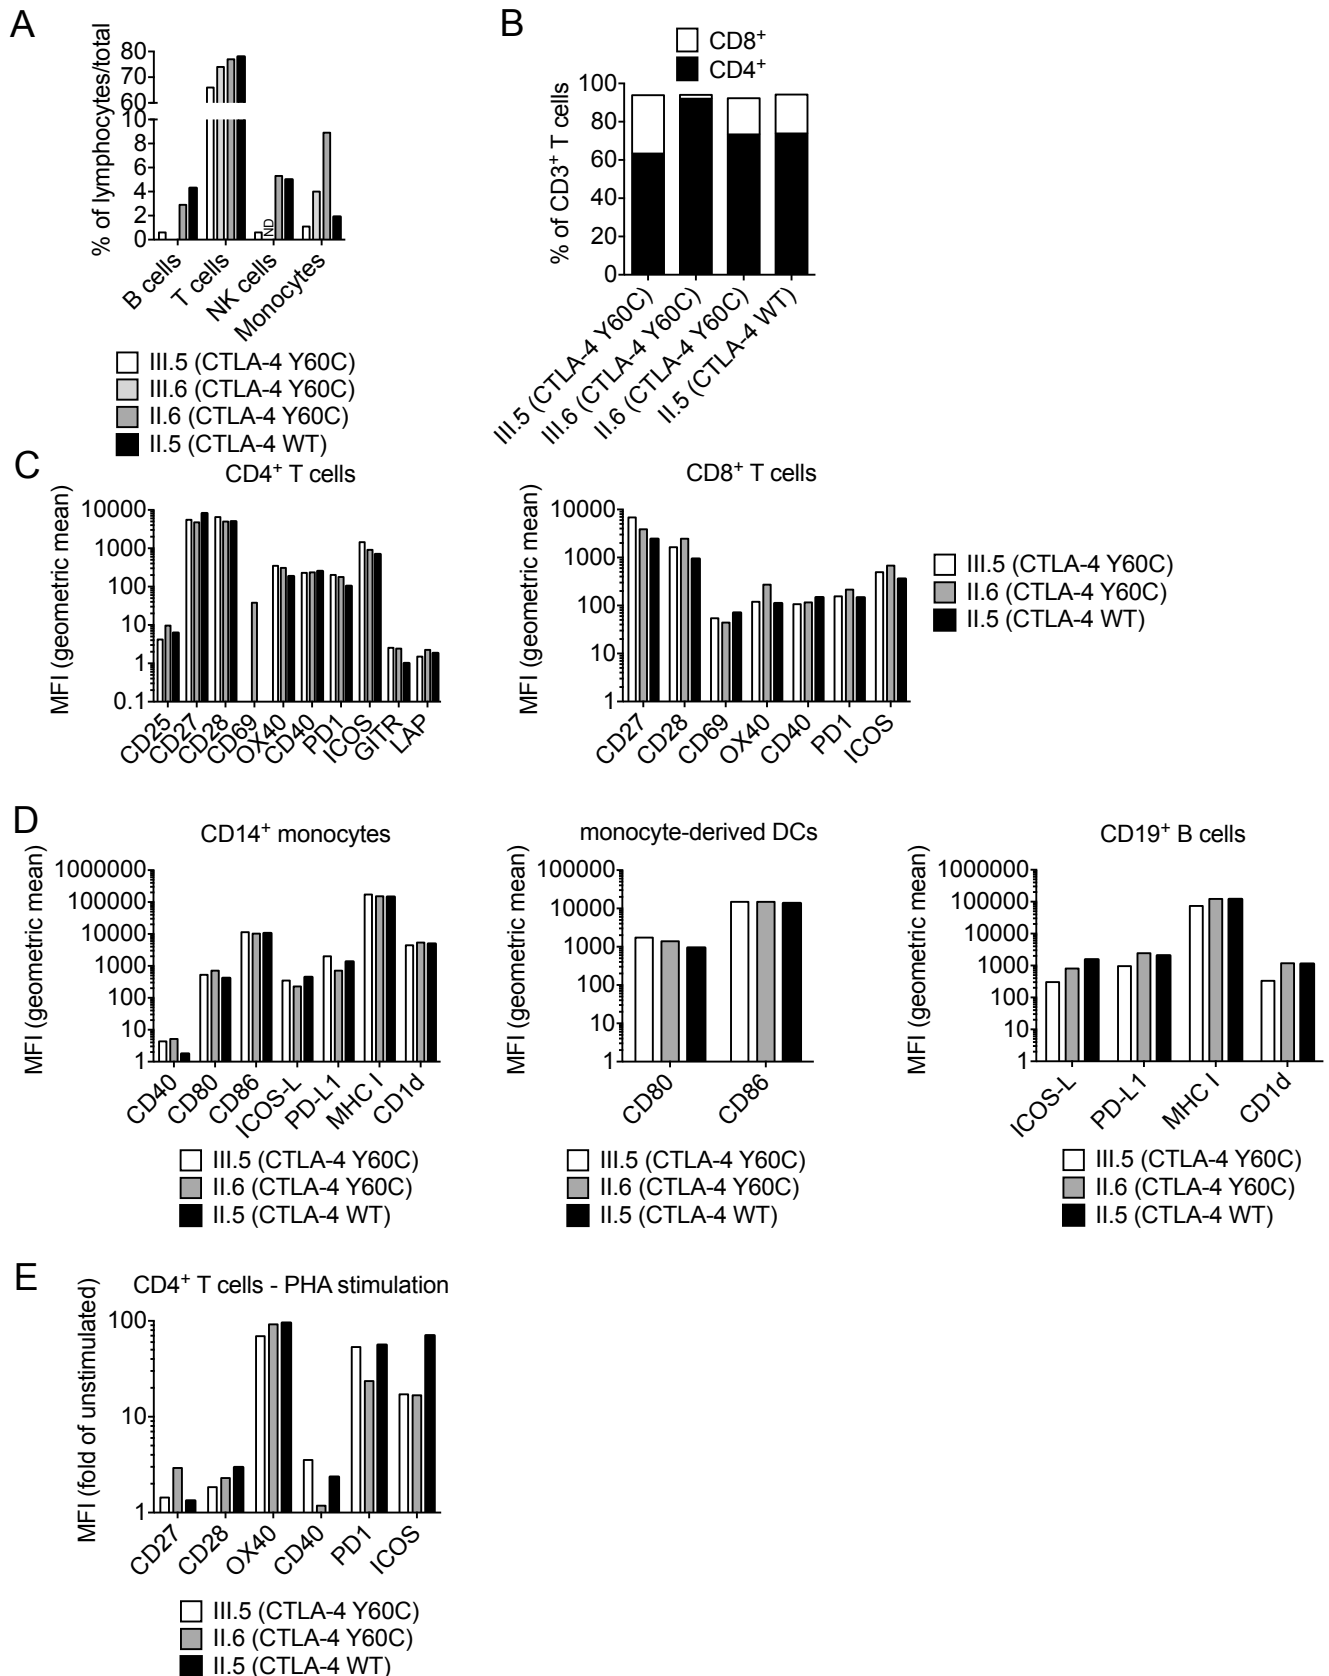

**Suppl. Fig. 4. Phenotype and function of immune cells in carriers of WT and Y60C CTLA-4.** A. Percentage of the indicated cell populations among lymphocytes (T, B, NK cells) or total cells (monocytes) as determined by flow cytometry. B. Percentage of CD4<sup>+</sup> and CD8<sup>+</sup> cells among CD3<sup>+</sup> T cells as determined by flow cytometry. C. Expression of selected cell surface markers by CD4<sup>+</sup> T cells (left) and CD8<sup>+</sup> T cells (right) as determined by flow cytometry. D. Expression of selected cell surface markers as determined by flow cytometry on monocytes (left), monocyte-derived DCs (middle) and B cells (right). E. Fold induction of selected cell surface markers on CD4<sup>+</sup> T cell upon stimulation by PHA as determined by flow cytometry.

## Suppl. Table. 1

**Suppl. Table 1.** Primer sequences and conditions for Sanger sequencing of *CTLA4*

| primer name    | primer sequence           | T <sub>M</sub> |
|----------------|---------------------------|----------------|
| CTLA-4_Exon1_F | CACGGCTTCCTTTCTCGTAA      | 60             |
| CTLA-4_Exon1_R | AGGGTCTGAAATTGCCTGTG      | 60             |
| CTLA-4_Exon2_F | GAGAGGGGAAGGGGTAAGTG      | 60             |
| CTLA-4_Exon2_R | AGACTGCAATGCAACAGGTG      | 60             |
| CTLA-4_Exon3_F | CCAAACCTATTGGTGGGCTA      | 60             |
| CTLA-4_Exon3_R | GAAACCCTGCTCAGAAGCAC      | 60             |
| CTLA-4_Exon4_F | ATAGGCTTTCTGGGTGTTCTTTC   | 60             |
| CTLA-4_Exon4_R | GTGCCATTCCCTAACTTAATTCC   | 60             |
| CTLA-4_pro1_F  | CTGTTTGCATGTCAGCCTTC      | 60             |
| CTLA-4_pro1_R  | CTTCTGGGCATCCTTAACCA      | 60             |
| CTLA-4_pro2_F  | TTTCTCTTAACCAAATGCTAAATGG | 60             |
| CTLA-4_pro2_R  | GTCCTGGTAGCCAGGTTTCAG     | 60             |

## Suppl. Table. 2

Suppl. Table 2. Exome Sequencing coverage

| Sample | Coverage of exome target |                     |                      |               |                |
|--------|--------------------------|---------------------|----------------------|---------------|----------------|
|        | % covered $\geq 1x$      | % covered $\geq 8x$ | % covered $\geq 20x$ | mean coverage | Gb of coverage |
| III.5  | 96.65                    | 89.45               | 78.6                 | 52.44         | 3.25           |
| III.6  | 95.96                    | 87.38               | 73.49                | 39.18         | 2.43           |
| II.5   | 97.29                    | 91.42               | 80.90                | 48.87         | 3.03           |
| II.6   | 97.07                    | 91.02               | 79.81                | 46.92         | 2.91           |
| II.9   | 97.04                    | 91                  | 80.33                | 47.7          | 2.96           |

### Suppl. Table. 3

Suppl. Table 3. Expression pattern of WT and Y60C CTLA-4 alleles.

|                          | <b>log<sub>2</sub> (VIC/FAM)</b> | <b>Ratio WT/Y60C</b> |
|--------------------------|----------------------------------|----------------------|
| <b>Healthy control 1</b> | 0.22                             | 150.4                |
| <b>Healthy control 2</b> | 0.23                             | 157.3                |
| <b>II.6</b>              | -1.38                            | 0.85                 |
| <b>II.5</b>              | 0.19                             | 135.8                |
| <b>III.5</b>             | -1.28                            | 1.19                 |

## Suppl. Table. 4

Suppl. Table 4. Results of *CTLA4* sequencing.

| rsID       | Genomic position<br>(Build 36) | Variant | Function | II.9 | II.5 | II.6 | III.6 | III.5 |
|------------|--------------------------------|---------|----------|------|------|------|-------|-------|
| rs231775   | 204,440,959                    | A>G     | T17A     | AG   | AG   | AG   | AG    | AG    |
| n/a        | 204,443,623                    | A>G     | Y60C     | AA   | AA   | AG   | AG    | AG    |
| rs59665421 | 204,446,337                    | T>C     | 3' UTR   | TC   | TT   | TT   | TT    | TT    |



## Suppl. Table. 5

**Suppl. Table 5.** Immunological characterization of patient III.6 under Ig supplementation.

| Parameter                                                                            | Value | Reference   |
|--------------------------------------------------------------------------------------|-------|-------------|
| IgG1 (mg/dl)                                                                         | 488   | 422-1,292   |
| IgG2 (mg/dl)                                                                         | 307   | 117-747     |
| IgG3 (mg/dl)                                                                         | 30    | 41-129      |
| IgG4 (mg/dl)                                                                         | <4    | 10-67       |
| IgA (mg/dl)                                                                          | 8     | 70-312      |
| IgM (mg/dl)                                                                          | <4    | 40-240      |
| White blood cell count (cells/ $\mu$ l)                                              | 3.43  | 5.82-9.32   |
| Hemoglobin (g/dl)                                                                    | 11.6  | 10.9-13.4   |
| Hematocrit (%)                                                                       | 36.6  | 31.7-39.1   |
| Platelets (cells/ $\mu$ l)                                                           | 266   | 174-333     |
| Absolute neutrophil count (cells/ $\mu$ l)                                           | 2.5   | 3.32-6.3    |
| Absolute lymphocyte count (cells/ $\mu$ l)                                           | 0.48  | 1.14-2.28   |
| Absolute eosinophil count (cells/ $\mu$ l)                                           | 0     | 0.06-0.18   |
| Neutrophils (%)                                                                      | 73    | 50-78       |
| Lymphocytes (%)                                                                      | 14    | 10-38       |
| Monocytes (%)                                                                        | 13    | 4-7         |
| Eosinophils (%)                                                                      | 0     | 2-3         |
| % CD3 <sup>+</sup> (%)                                                               | 85    | 56-84       |
| CD3 <sup>+</sup> , absolute (cells/ $\mu$ l)                                         | 330   | 1,000-2,000 |
| % CD3 <sup>+</sup> CD4 <sup>+</sup> (%)                                              | 56    | 28-52       |
| CD3 <sup>+</sup> CD4 <sup>+</sup> , absolute (cells/ $\mu$ l)                        | 212   | 530-1,500   |
| %CD3 <sup>+</sup> CD8 <sup>+</sup> (%)                                               | 26    | 18-35       |
| CD3 <sup>+</sup> CD8 <sup>+</sup> , absolute (cells/ $\mu$ l)                        | 101   | 330-1,100   |
| % CD3 <sup>-</sup> /CD16 <sup>+</sup> or CD56 <sup>+</sup> (%)                       | 11    | 3-22        |
| CD3 <sup>-</sup> /CD16 <sup>+</sup> or CD56 <sup>+</sup> , absolute (cells/ $\mu$ l) | 43    | 70-480      |
| % CD19 <sup>+</sup> (%)                                                              | 1     | 6-23        |
| CD19 <sup>+</sup> , absolute (cells/ $\mu$ l)                                        | 2     | 110-570     |
| CD4 <sup>+</sup> /CD8 <sup>+</sup> ratio                                             | 2.11  | 0.9-3.7     |

## Suppl. Table. 6

**Suppl. Table 6.** RefSeq sequence identifiers for the sequences in Fig. 2A. Sequences are from human CTLA-4, orthologs from mammals, birds and reptiles, as well as three CD28 paralogs.

| <b>Species</b>                                           | <b>RefSeq identifier</b> |
|----------------------------------------------------------|--------------------------|
| <i>Homo sapiens</i>                                      | NP_005205                |
| <i>Oryctolagus cuniculus</i> (European rabbit)           | NP_001076154             |
| <i>Mus musculus</i> (house mouse)                        | NP_033973                |
| <i>Sus scrofa</i> (pig)                                  | NP_999314                |
| <i>Felis catus</i> (domestic cat)                        | NP_001009236             |
| <i>Bos taurus</i> (cattle)                               | NP_776722                |
| <i>Loxodonta africana</i> (African elephant)             | XP_003406166             |
| <i>Monodelphis domestica</i> (gray short-tailed opossum) | XP_001371314             |
| <i>Sarcophilus harrisii</i> (Tasmanian devil)            | XP_003766048             |
| <i>Gallus gallus</i> (chicken)                           | NP_001035180             |
| <i>Taeniopygia guttata</i> (zebra finch)                 | XP_002197489             |
| <i>Alligator mississippiensis</i> (American alligator)   | XP_006267305             |
| <i>Pelodiscus sinensis</i> (Chinese softshell turtle)    | XP_006114304             |
| <i>Homo sapiens</i> (CD28)                               | NP_006130                |
| <i>Monodelphis domestica</i> (CD28)                      | XP_007501953             |
| <i>Gallus gallus</i> (CD28)                              | XP_990642                |

Suppl. Table. 7

**Suppl. Table 7.** Potential genetic modifiers. Exomes were filtered for SNVs in genes known to be associated with immunodeficiency, with a genotype shared between the affected children (III.5, III.6) but not with the unaffected mother (II.6), and excluding synonymous variants.

| Chr   | Position    | Gene symbol     | Ref. Base | Var. Base | II.5 | II.6 | II.9 | III.5 | III.6 | Mut. Type | Function | Effect | AA Subst | Phylo P44 | Grant-ham | pPh2 Prob. | SIFT score | Rs number  | MAF G1000 CEU |
|-------|-------------|-----------------|-----------|-----------|------|------|------|-------|-------|-----------|----------|--------|----------|-----------|-----------|------------|------------|------------|---------------|
| chr15 | 89,127,103  | <i>BLM</i>      | C         | T         | CT   | CC   | CT   | CT    | CT    | het       | Exon     | mis    | P868L    | 5.05      | 98        | 0.149      | 0.00       | rs11852361 |               |
| chr15 | 89,155,525  | <i>BLM</i>      | G         | A         | AG   | GG   | AG   | AG    | AG    | het       | Exon     | mis    | V1321I   | -0.39     | 29        | 0.003      | 0.61       | rs7167216  |               |
| chr5  | 41,235,716  | <i>C6</i>       | G         | T         | GT   | TT   | GT   | GT    | GT    | het       | Exon     | mis    | A119E    | 1.38      | 107       | 0.001      | 1          | rs1801033  | 0.675         |
| chr2  | 86,922,293  | <i>CD8B</i>     | T         | G         | TT   | GG   | TT   | GT    | GT    | het       | Intron   | -      | -        | -0.58     | -         | -          | -          | rs15800    |               |
| chr2  | 86,927,363  | <i>CD8B</i>     | C         | T         | CT   | CC   | CT   | CT    | CT    | het       | Exon     | mis    | V180I    | 0.36      | 29        | 0.155      | 1          |            |               |
| chr9  | 276,593     | <i>DOCK8</i>    | C         | A         | AA   | CC   | AC   | AC    | AC    | het       | Exon     | mis    | P29T     | 2.19      | 38        | 0.457      | 0.01       | rs529208   | 0.416667      |
| chr1  | 92,713,945  | <i>GF11</i>     | A         | G         | AA   | GG   | AG   | AG    | AG    | het       | 3UTR     | -      | -        | -4.74     | -         | -          | -          | rs4970714  | 0.666667      |
| chr1  | 205,008,152 | <i>IL10</i>     | T         | C         | CT   | CC   | TT   | CT    | CT    | het       | 3UTR     | -      | -        | -0.41     | -         | -          | -          | rs3024498  | 0.225         |
| chr1  | 205,008,487 | <i>IL10</i>     | A         | G         | AG   | GG   | AG   | AG    | AG    | het       | 3UTR     | -      | -        | 1.53      | -         | -          | -          | rs3024496  | 0.475         |
| chr21 | 33,590,617  | <i>IL10RB</i>   | A         | G         | GG   | AG   | AG   | GG    | GG    | hom       | 3UTR     | -      | -        | -1.51     | -         | -          | -          | rs3171425  | 0.575         |
| chr21 | 33,591,251  | <i>IL10RB</i>   | G         | A         | AA   | AG   | AG   | AA    | AA    | hom       | 3UTR     | -      | -        | -0.78     | -         | -          | -          | rs1058867  | 0.575         |
| chr5  | 35,910,332  | <i>IL7R</i>     | C         | T         | CC   | TT   | CC   | CT    | CT    | het       | Exon     | mis    | T244I    | -0.88     | 89        | 0.001      | 0.37       | rs6897932  | 0.258333      |
| chr11 | 57,138,565  | <i>SERPING1</i> | G         | A         | GG   | AA   | GG   | AG    | AG    | het       | Exon     | mis    | V480M    | -0.69     | 21        | 0.034      | 0.03       | rs4926     | 0.216667      |
| chr17 | 73,650,172  | <i>TMC8</i>     | A         | G         | GG   | AA   | GG   | AG    | AG    | het       | 3UTR     | -      | -        | 0.34      | -         | -          | -          | rs4789015  | 0.516667      |
| chr6  | 158,536,864 | <i>GTF2H5</i>   | A         | C         | AC   | AA   | AC   | AC    | AC    | het       | 3UTR     | -      | -        | -0.33     | -         | -          | -          | rs4354181  |               |
| chr6  | 158,539,936 | <i>GTF2H5</i>   | G         | C         | CG   | GG   | CG   | CG    | CG    | het       | 3UTR     | -      | -        | -0.48     | -         | -          | -          | rs71563797 | 0.158333      |
| chr3  | 197,683,601 | <i>RNF168</i>   | G         | T         | GT   | GT   | GT   | TT    | TT    | hom       | Exon     | mis    | P401Q    | 1.68      | 76        | 0.216      | 0.01       | rs3796129  | 0.591667      |
| chr19 | 7,618,277   | <i>STXBP2</i>   | A         | G         | AA   | GG   | AG   | AG    | AG    | het       | Exon     | mis    | I526V    | -0.48     | 29        | 0.000      | 0.58       | rs6791     | 0.675         |
